# Supplementary material
Source: publisher figshare collection journal article supplement (https://tandf.figshare.com/ndownloader/files/14162804)
Supplement: Supplementary file 1 [file 14162804]

# Search strategy for PEDro – Physiotherapy Evidence Database

| **AND** | | |
| --- | --- | --- |
| **Population** | **Intervention** | **Study design** |
| Pulmonary surgical procedure [tiab]  Thoracic surgery [tiab]  Video-assisted thoracic surgery [tiab]  Video assisted thorascopic surgery [tiab]  Lung surgery [tiab]  Lung resection surgery [tiab]  Lung resectional surgery [tiab]  Lung resection [tiab]  Lung volume reduction surgery [tiab]  Lobectomy [tiab] | Respiratory physiotherapy [therapy] | Clinical trial [method] |
| AND denotes boolean operators (terms of population have been searched separately with (AND) term of Intervention AND Study design)  [tiab] denotes search in title and abstract  [therapy] denotes search in therapy type  [method] denotes search in publication type  (p) denotes search in both single and plural | | |
